# Supplementary material for: MODIS Time Series Reveal New Maximum Records of Defoliated Area by Ormiscodes amphimone in Deciduous Nothofagus Forests, Southern Chile
Source: MDPI journal article supplement (doi:10.3390/rs15143538), 2023-07-14
Supplement: s1 [file s1]

## Supplementary material

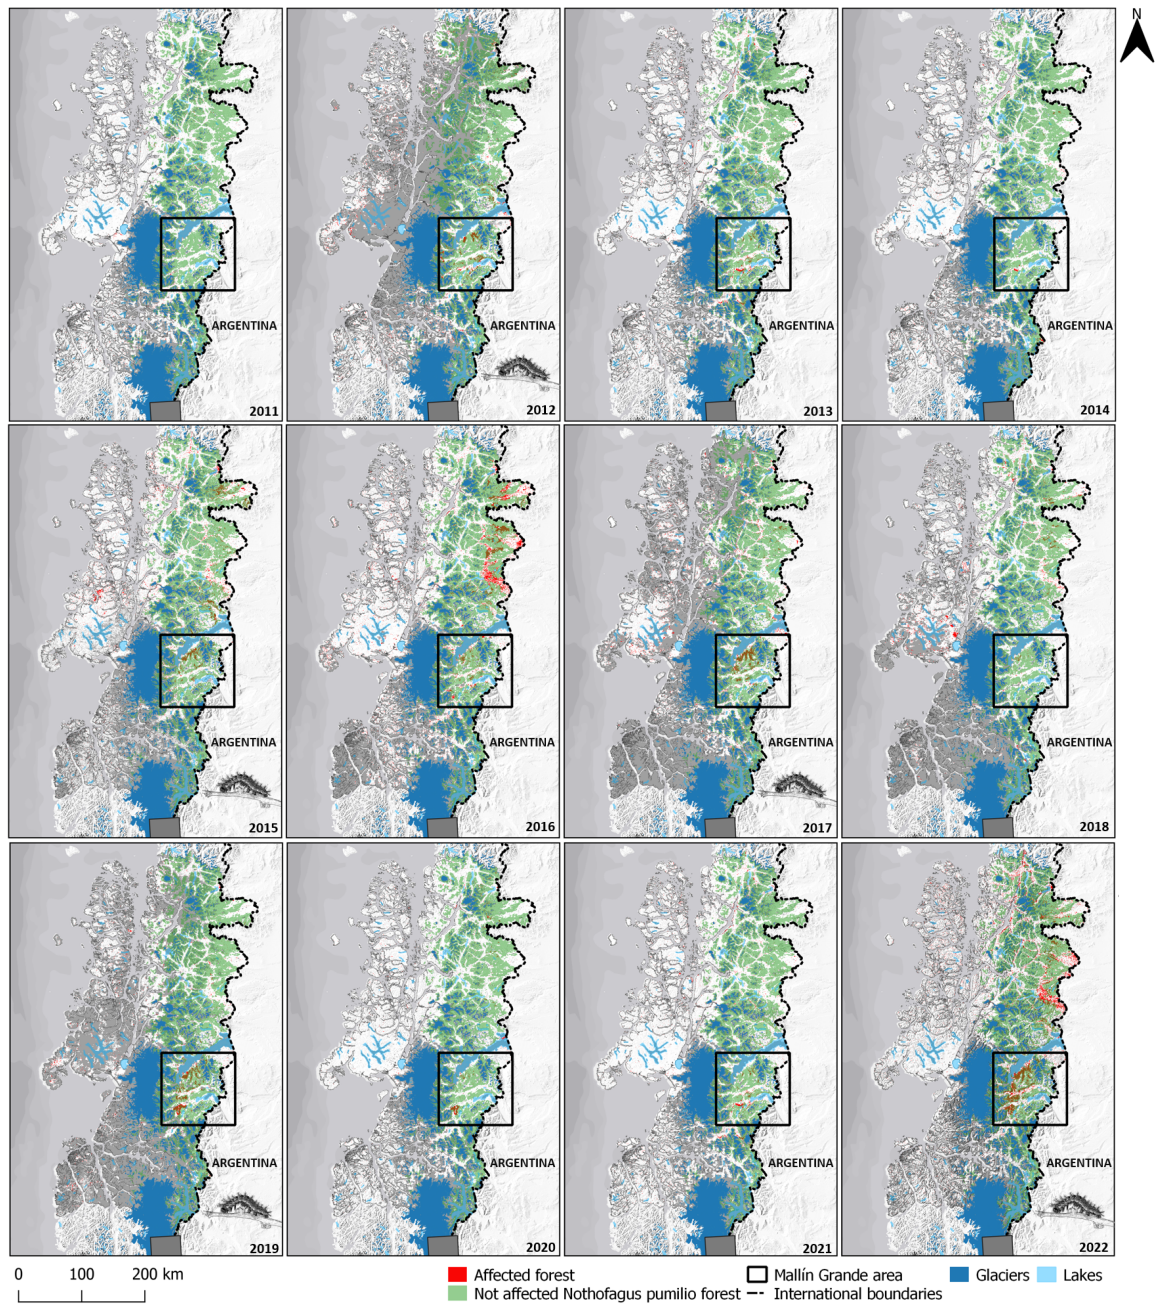

**Figure S1.** Extreme EVI anomalies (outside the 0.90 reference frequency distribution) in *N. pumilio* forests in the Aysén region, Southern Chile. Black boxes show the location of Mallín Grande where the most extensive *Ormiscodes* outbreaks take place. Maps with a picture of the *Ormiscodes* caterpillar indicate dates with field confirmed outbreaks.
